# Supplementary material
Source: PubMed Central journal article supplement (PMC8296565)
Supplement: 12913_2021_6741_MOESM1_ESM.pdf [file 12913_2021_6741_MOESM1_ESM.pdf]

## COVID-19 Employee Survey

---

### CONSENT INTRO

---

**Instructions:** *Unless otherwise specified, please select only one answer for each question. If you are uncertain, or choose not to answer, leave the question blank.*

**(1) What is your main form of transportation to work since March 2020 (the start of the COVID pandemic)?**

- 01. Car (drive alone)
- 02. Car (carpool with other people)
- 03. Public Transit
- 04. Bicycle
- 05. Walk
- 06. Uber/Lyft/Taxi or other rideshare
- 07. N/A, working from home
- 08. Other :

**(2) Is this different from your usual transportation before the COVID-19 pandemic?**

- 00. No
- 01. Yes

**(2A) IF YES, what was your transportation before the COVID-19 pandemic?**

- 01. Car (drive alone)
- 02. Car (carpool with other people)
- 03. Public Transit
- 04. Bicycle
- 05. Walk
- 06. Uber
- 07. Other:

**(3) How much has your job at Tufts Medical Center been affected by the COVID-19 pandemic?**

- 01. Not at all
- 02. Somewhat
- 03. A good deal
- 04. Very much
- 05. Don't know

**(4) In what ways has your job been affected? *Check all that apply.***

- 01. I have been furloughed through reduced working hours (communicated to me through my manager)
- 02. I have reduced my hours because of other obligations
- 03. I have had my work hours increased
- 04. I have been asked to work in a different place than usual
- 05. I have been asked to work from home
- 06. I am on leave of absence
- 07. My work is more stressful
- 08. None of these ways
- 09. Other:

Please, specify.

**(5) How worried are you about using up your sick leave and paid time off?**

- 01. Not at all
- 02. Somewhat
- 03. A good deal
- 04. Very much
- 05. I don't get sick leave or paid time off

**(6) Do you have any other jobs outside of your job at Tufts Medical Center? This includes work as an employee for another company, an independent contractor (Uber, Lyft driver, moonlighter), or any other way you earn money (babysitting, house cleaning, etc.).**

- 00. No
- 01. Yes

**(6A) IF YES, how has your other employment been affected by the COVID-19 pandemic (after March 2020)?**

- 01. I am still going to my other job/workplace for the same number of hours as before the pandemic
- 02. I am still going to my other workplace but am working reduced hours
- 03. I am still going to my other workplace and am working more hours
- 04. I am working from home for my other employment
- 05. I lost my other job
- 06. I had to quit my other job because I need to take care of people who depend on me (children, parents)

**(7A) Imagine a ladder with steps numbered from zero at the bottom to 10 at the top. The top of the ladder represents the best possible life for you and the bottom of the ladder represents the worst possible life for you. Where on this ladder would you put yourself before March 1, 2020 (the start of the COVID-19 pandemic)? 1 is the bottom and 10 is the top.**

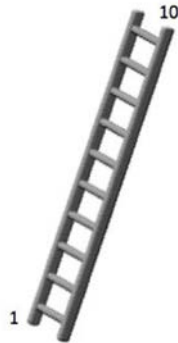

|    |    |    |    |    |    |    |    |    |    |
|----|----|----|----|----|----|----|----|----|----|
| 01 | 02 | 03 | 04 | 05 | 06 | 07 | 08 | 09 | 10 |
|----|----|----|----|----|----|----|----|----|----|

**(7B) Since March 2020 (the start of the COVID-19 pandemic), where would you place yourself now? 1 is the bottom and 10 is the top.**

|    |    |    |    |    |    |    |    |    |    |
|----|----|----|----|----|----|----|----|----|----|
| 01 | 02 | 03 | 04 | 05 | 06 | 07 | 08 | 09 | 10 |
|----|----|----|----|----|----|----|----|----|----|

**(8) Since March 2020 (the start of the COVID-19 pandemic), have you been worried about any of the following? Check all that apply.**

- 01. Not having enough money to pay next month's rent or mortgage
- 02. Not having enough money to pay next month's heating, electricity, or internet bills
- 03. Not having enough money to buy food
- 04. Not having enough money to pay for medicine or medical bills
- 05. Not having enough money to pay for childcare or other care for a family member or loved one
- 06. Not having enough money to pay for transportation to work

**(9) How many people live in your house (include yourself)?**

|    |    |    |    |    |    |    |    |    |     |
|----|----|----|----|----|----|----|----|----|-----|
| 01 | 02 | 03 | 04 | 05 | 06 | 07 | 08 | 09 | 10+ |
|----|----|----|----|----|----|----|----|----|-----|

**(10) How many people that live in your home are under 18 years old?**

|    |    |    |    |    |    |    |    |    |    |     |
|----|----|----|----|----|----|----|----|----|----|-----|
| 00 | 01 | 02 | 03 | 04 | 05 | 06 | 07 | 08 | 09 | 10+ |
|----|----|----|----|----|----|----|----|----|----|-----|

**(11) How many people use/share your kitchen or living room (include yourself)?**

|    |    |    |    |    |    |    |    |    |    |
|----|----|----|----|----|----|----|----|----|----|
| 01 | 02 | 03 | 04 | 05 | 06 | 07 | 08 | 09 | 10 |
|----|----|----|----|----|----|----|----|----|----|

**(12) Did anyone who lives in your house lose their job?**

- 00. No
- 01. Yes

**(13) How likely do you think it is that you will get COVID-19 in the next month?**

- 01. Very likely
- 02. Somewhat likely
- 03. Neither likely nor unlikely
- 04. Somewhat unlikely
- 05. Very unlikely

**(14) Has anyone you know (e.g., family members, friends, neighbors, coworkers) died or been hospitalized from COVID-19?**

- 00. No
- 01. Yes

***In the following questions we are referring to the nasal or oral swab test for COVID-19 (not the blood test):***

**(15) Since the start of the COVID-19 pandemic (March, 2020), did you want to get a COVID-19 test?**

- 00. No. -> **SKIP TO 19**
- 01. Yes---> **Continue to #16**

**(16) Did you want a test for any of these reasons? *Check all that apply.***

- 01. I had a direct exposure (I was physically close to someone who I know tested positive for COVID-19)
- 01. I was told I needed to get tested to return to work
- 02. I heard that someone I knew had COVID-19
- 03. I had symptoms
- 04. I was worried

about infecting others

|                  |
|------------------|
| Please, specify. |
|------------------|

- 05. Something else:

**(17) Did you try to get a test in any of the following ways? *Check all that apply.***

- 01. Visit Tufts Medical Center (Tye Pavilion or Josiah Quincy) testing center?
- 02. Go to another COVID testing site?
- 03. Call your doctor for a test?

- 04. Call employee health/occupational health for a test?
- 05. Go to an Emergency Room for a test?
- 06. Go to an urgent care for a test?

**(18) Were you tested for COVID-19?**

- 00. No
- 01. Yes

**(18YA) IF YES, how many times have you been tested for COVID-19?**

|    |    |    |    |    |    |    |    |    |    |
|----|----|----|----|----|----|----|----|----|----|
| 01 | 02 | 03 | 04 | 05 | 06 | 07 | 08 | 09 | 10 |
|----|----|----|----|----|----|----|----|----|----|

**(18YB) IF YES, have you ever tested positive for COVID-19?**

- 00. No
- 01. Yes -----> ***IF YES, Go to PCR positive questions (TUSM)***

**(19) Why did you not get a COVID-19 test? Check all that apply.**

- 01. Worried about lost wages
- 02. Worried about using sick time or PTO (paid time off)
- 03. Worried about what people would think of me if I tested positive.
- 04. Could not get childcare
- 05. Worried about cost of testing
- 06. Did not meet testing criteria
- 07. Could not get transportation to testing site
- 08. Worried about my family if I had to quarantine
- 09. Worried about the test hurting

10. Testing center not open when I

needed it

11. Other:

|                  |
|------------------|
| Please, specify. |
|------------------|

**(20) We will ask some people to participate in another research study to test for COVID antibodies (blood test). Can we contact you?**

- 00. No
- 01. Yes

**(21) Can we contact you in the future for additional COVID-19 research studies?**

- 00. No

01. Yes

***End of Survey - Thank you!***
